# Supplementary material
Source: PubMed Central journal article supplement (PMC3117126)

## Supporting information

### Pyrimidine Nucleotides with 4-Alkyloxyimino and Terminal Phosphate Ester Modifications as Selective Agonists of the P2Y<sub>4</sub> Receptor

Hiroshi Maruoka, M.P. Suresh Jayasekara, Matthew O. Barrett, Derek A. Frankin, Sonia de Castro, Nathaniel Kim, Stefano Costanzi, T. Kendall Harden, and Kenneth A. Jacobson

| <b>Contents:</b>                                                                                                 | <u>page</u> |
|------------------------------------------------------------------------------------------------------------------|-------------|
| Spectra for compounds <b>10 – 16</b> , <b>20 – 26</b> , and <b>28 – 37</b>                                       | S2-S25      |
| Figure 1. Structure of <i>N</i> <sup>4</sup> - <i>t</i> -BuO-cytosine determined by x-ray crystallography        | S26         |
| Table 1. Crystal data and structure refinement for <i>N</i> <sup>4</sup> - <i>t</i> -BuO-cytosine.               | S27         |
| Figure 2. Crystal lattice of <i>N</i> <sup>4</sup> - <i>t</i> -BuO-cytosine determined by x-ray crystallography. | S28         |
| Figure 3. Stability data at pH 1.5 for compounds <b>15</b> , <b>16</b> , and <b>34</b> .                         | S29         |
| Figure 4. NOESY experiment for compound <b>39</b>                                                                | S30-S31     |

**Uridine-5'- $\beta,\gamma$ -dichloromethylene triphosphate ammonium salt (10)** **$^1\text{H}$  NMR**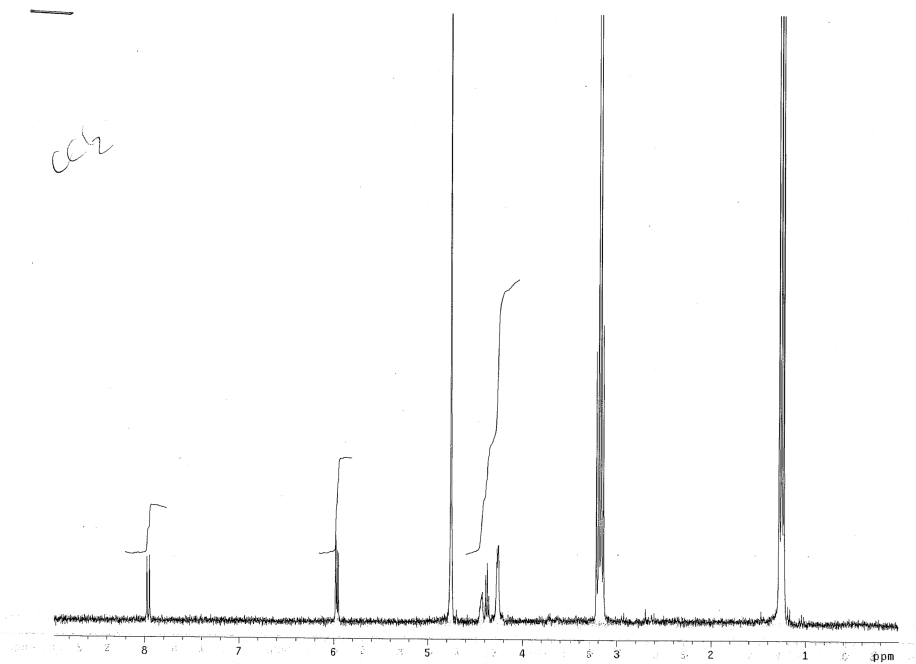**Mass**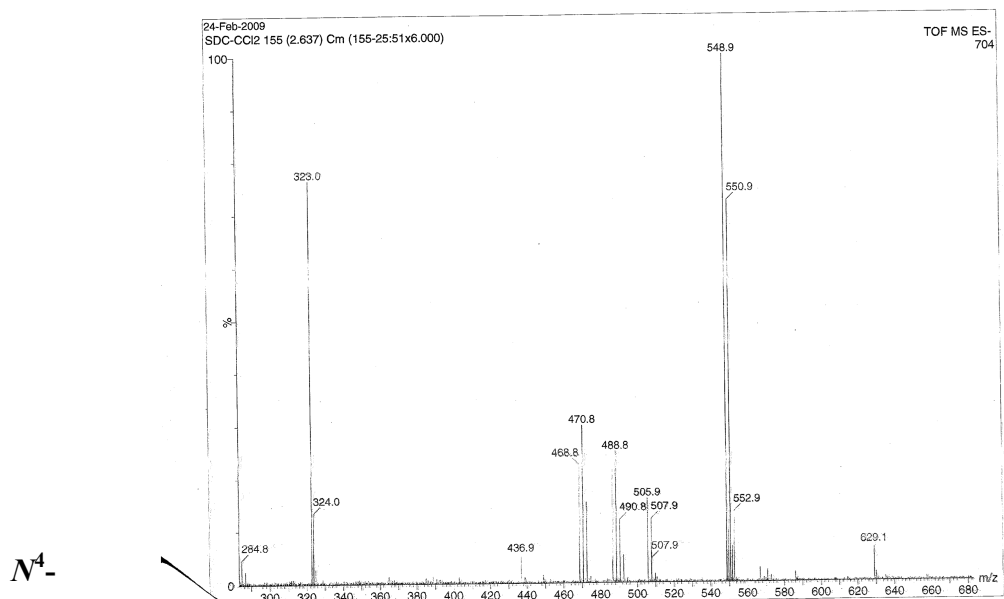

## Methoxycytidine-5'-triphosphate triethylammonium salt (11)

 $^1\text{H}$  NMR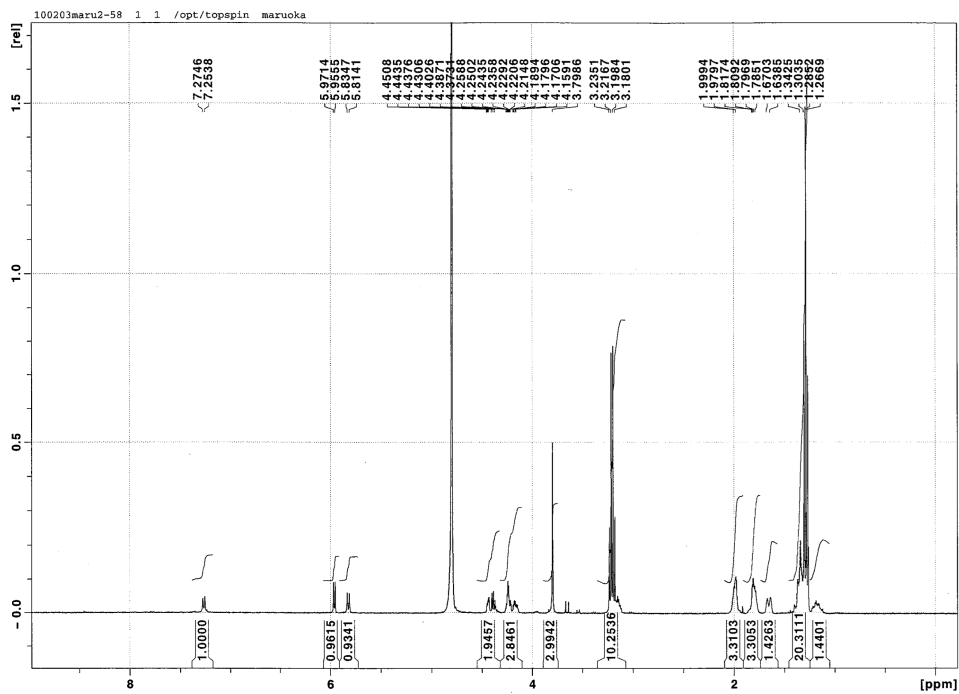 $^{31}\text{P}$  NMR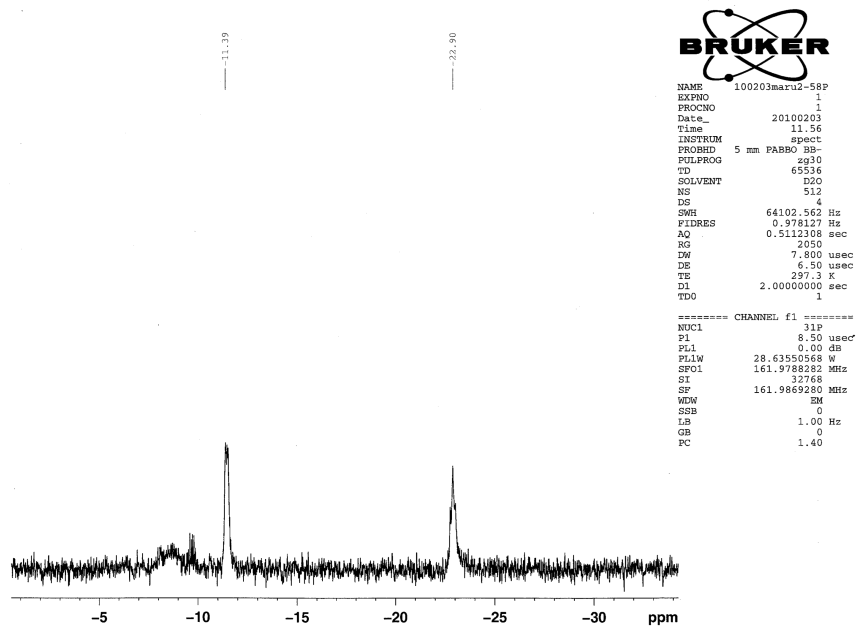



*N*<sup>4</sup>-*tert*-Butyloxycytidine-5'-triphosphate triethylammonium salt (13)

<sup>1</sup>H NMR

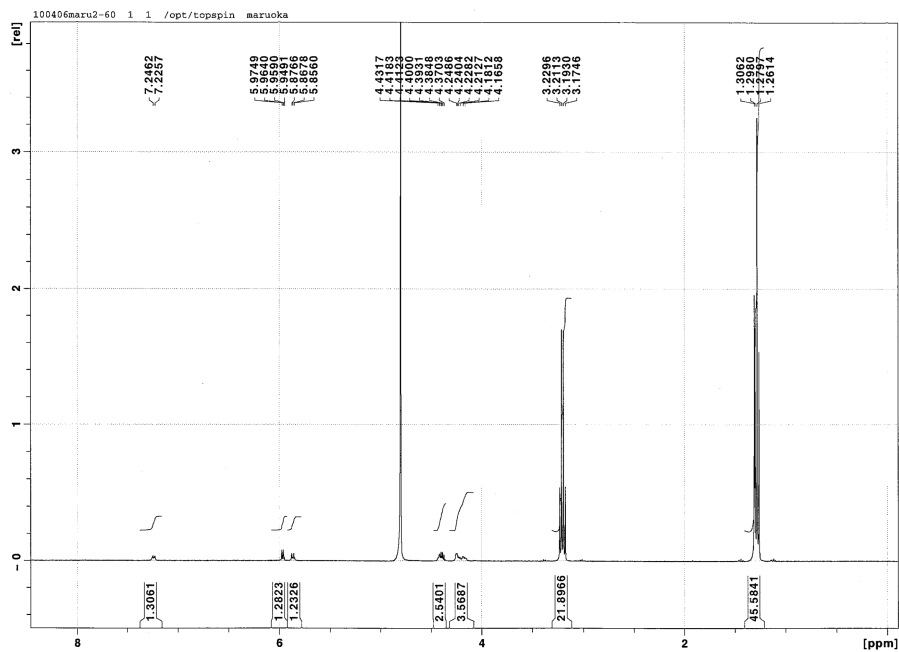

Mass

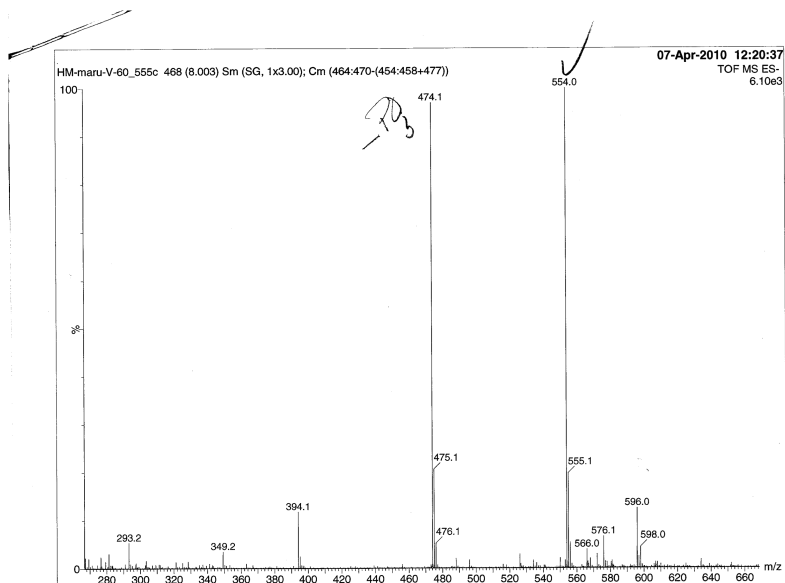



***N*<sup>4</sup>-Phenylethoxycytidine-5'-triphosphate triethylammonium salt (15)****<sup>1</sup>H NMR**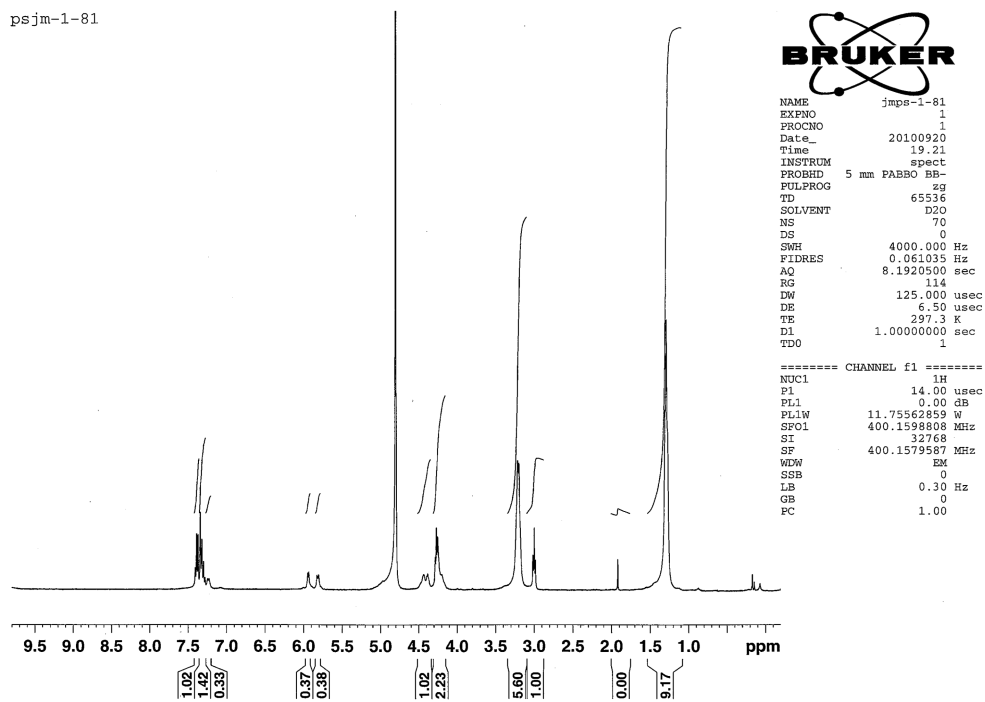**Mass**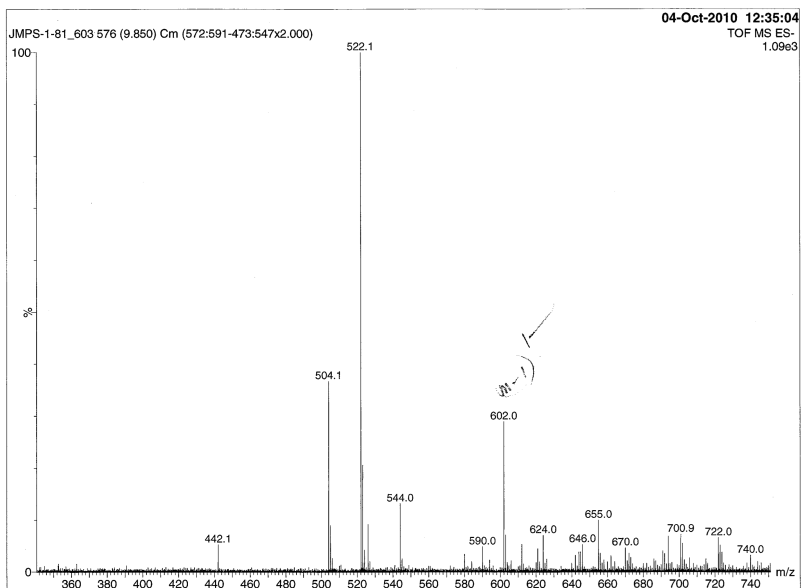

# $N^4$ -Phenylpropoxycytidine-5'-triphosphate triethylammonium salt (16)

## $^1\text{H}$ NMR

psjm-1-82

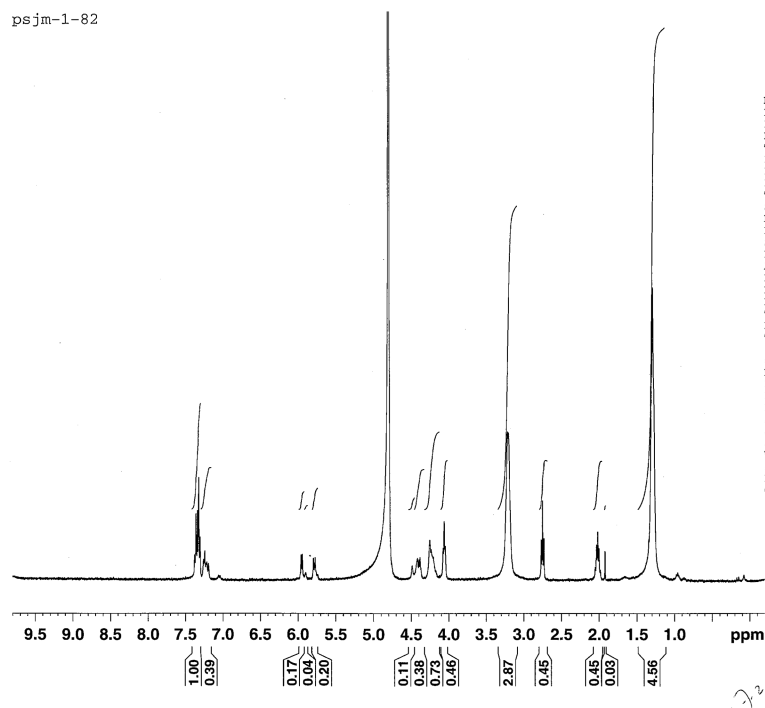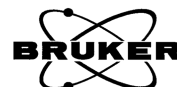

```

NAME          jmpr-1-82
EXPNO         3
PROCNO        1
Date_         20101001
Time          10.16
INSTRUM       spect
PROBHD        5 mm PABBO BB-
PULPROG       zg
TD            65536
SOLVENT       D2O
NS            27
DS            0
SWH           4000.000 Hz
FIDRES        0.061035 Hz
AQ            8.1920500 sec
RG            128
EM            125.000 usec
DE            6.50 usec
TE            297.6 K
DL            1.0000000 sec
TDO           1

```

```

===== CHANNEL f1 =====
NUC1          1H
P1            14.00 usec
PL1           0.00 dB
PLLW          11.75562859 W
SFO1          400.1598808 MHz
SI            32768
SF            400.1579587 MHz
WDW           EM
SSB           0
LB            0.30 Hz
GB            0
PC            1.00

```

## $^{31}\text{P}$ NMR

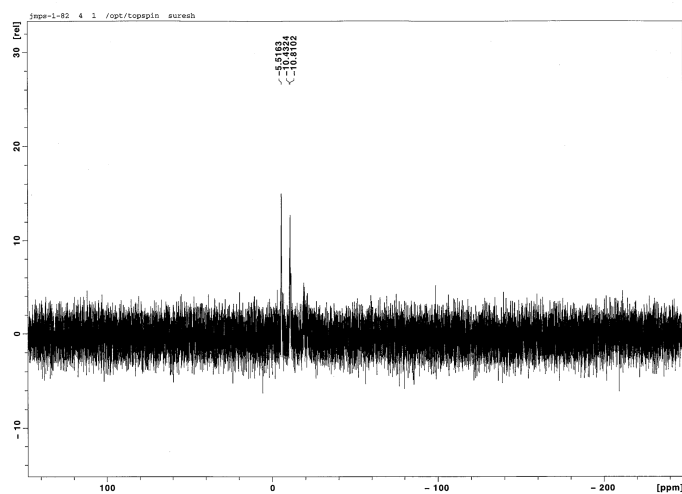



# Uridine-5'-(4-chlorophenyl)- tetraphosphate triethylammonium salt (20)

## $^1\text{H}$ NMR

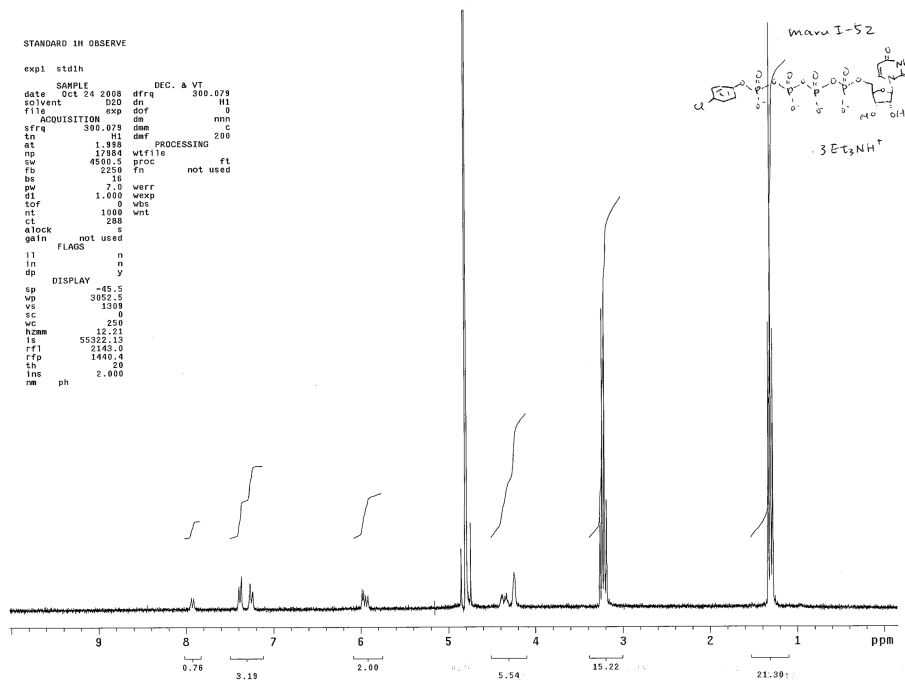

## $^{31}\text{P}$ NMR

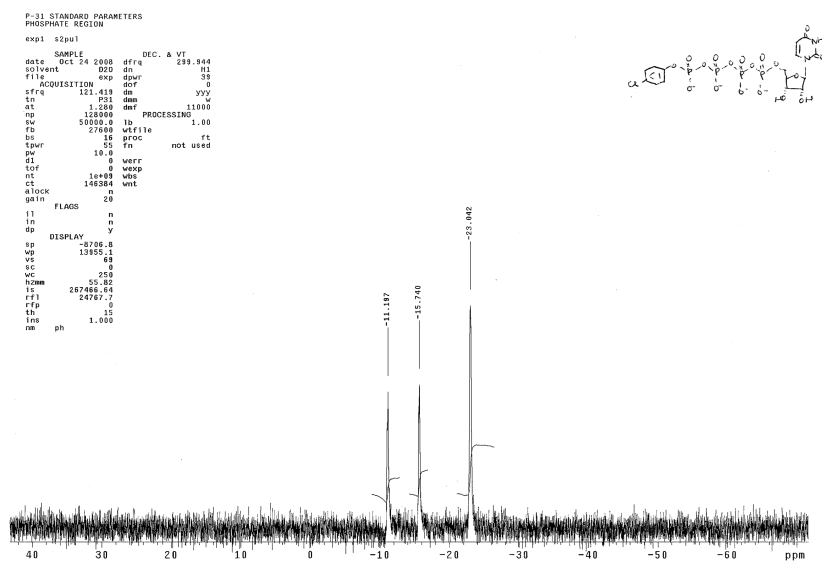

# Uridine-5'-(3-chlorophenyl)- tetraphosphate triethylammonium salt (21)

## $^1\text{H}$ NMR

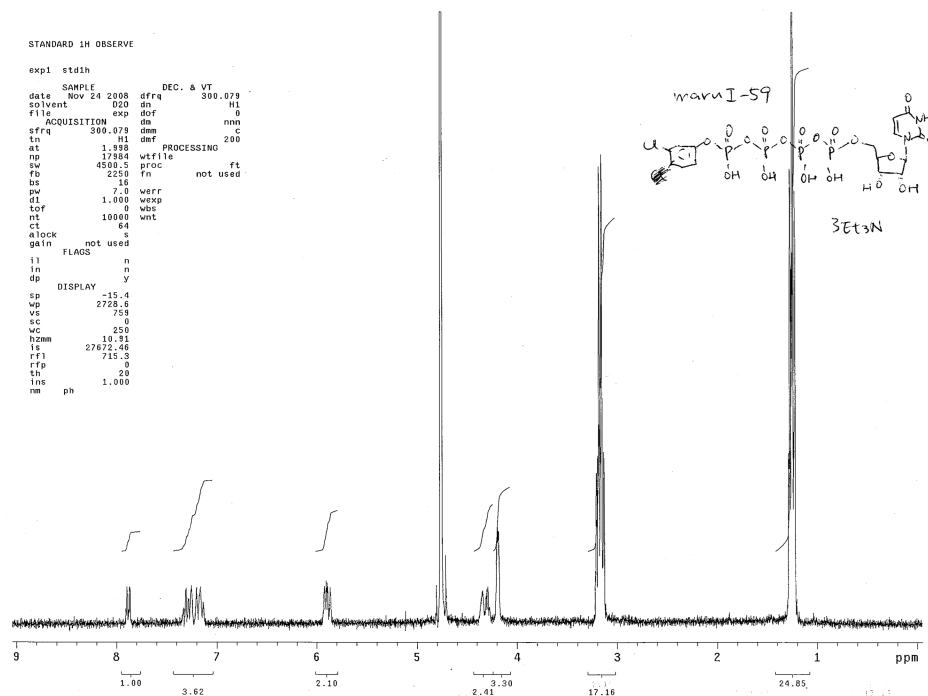

## $^{31}\text{P}$ NMR

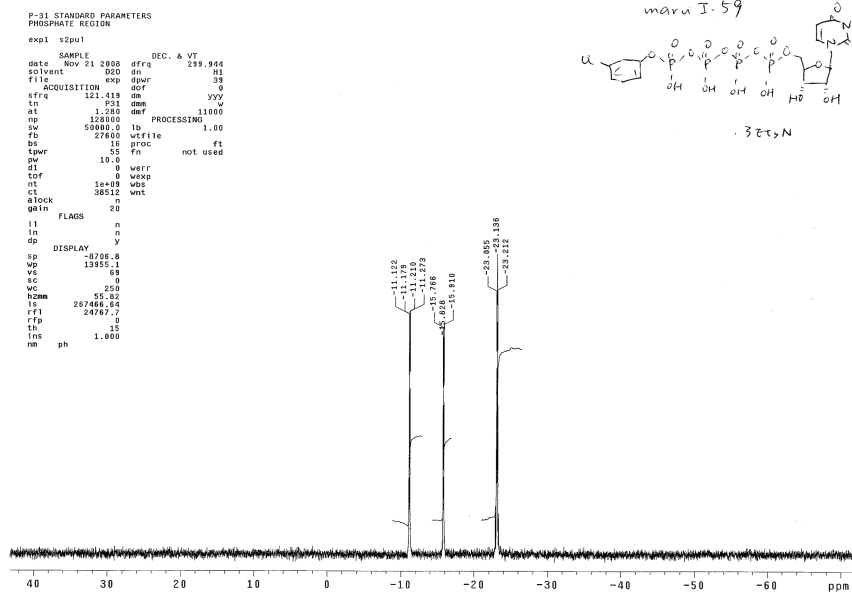

# Uridine-5'-(4-methoxyphenyl)- tetraphosphate triethylammonium salt (22)

## <sup>1</sup>H NMR

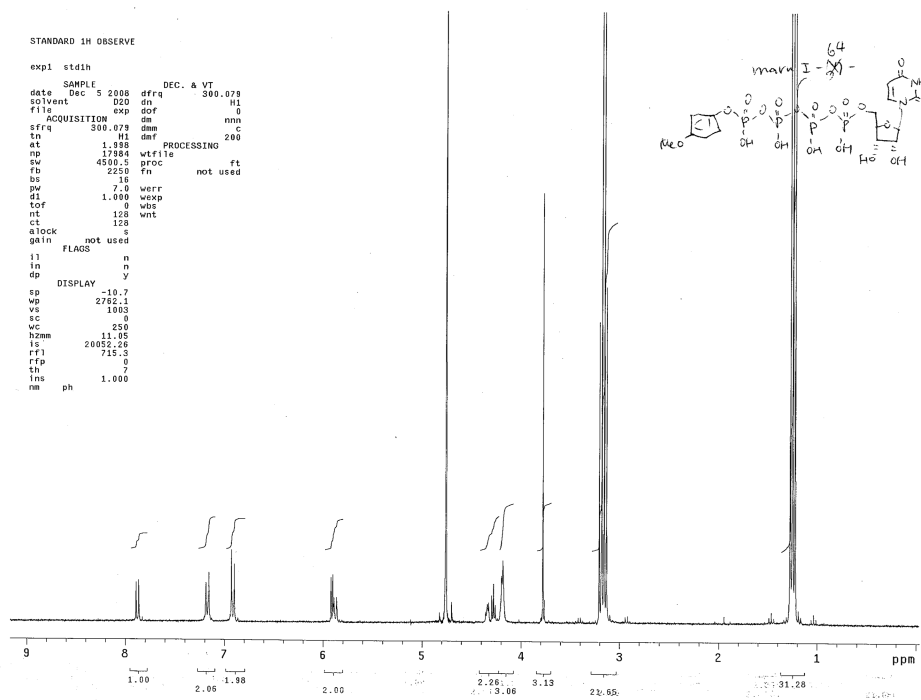

## <sup>31</sup>P NMR

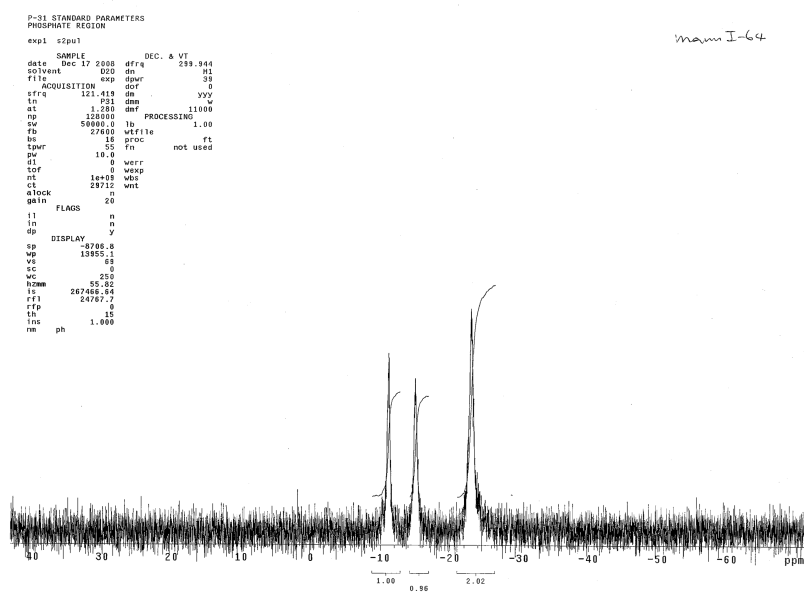

# Uridine-5'-(3-methoxyphenyl)- tetraphosphate triethylammonium salt (23)

## <sup>1</sup>H NMR

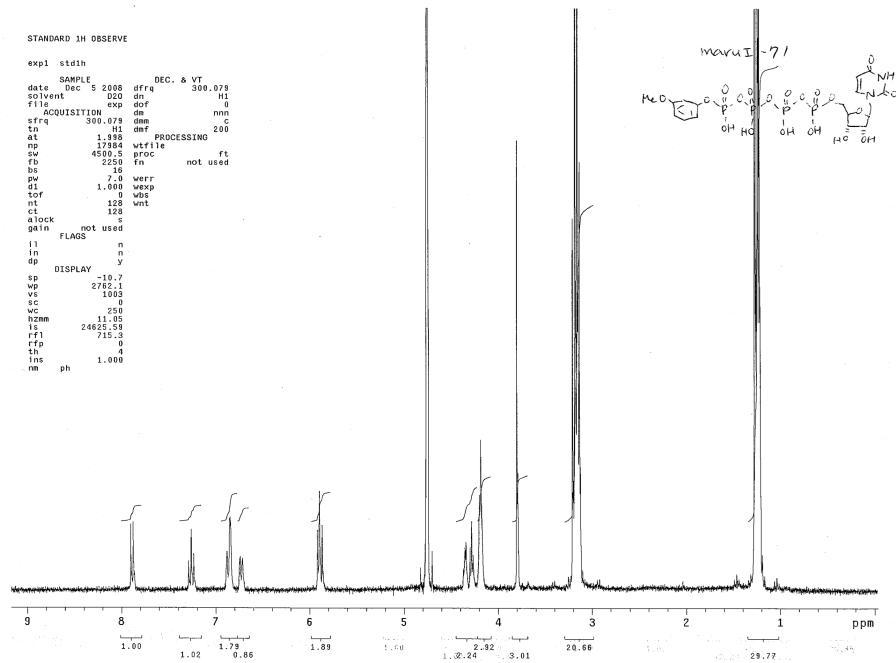

## <sup>31</sup>P NMR

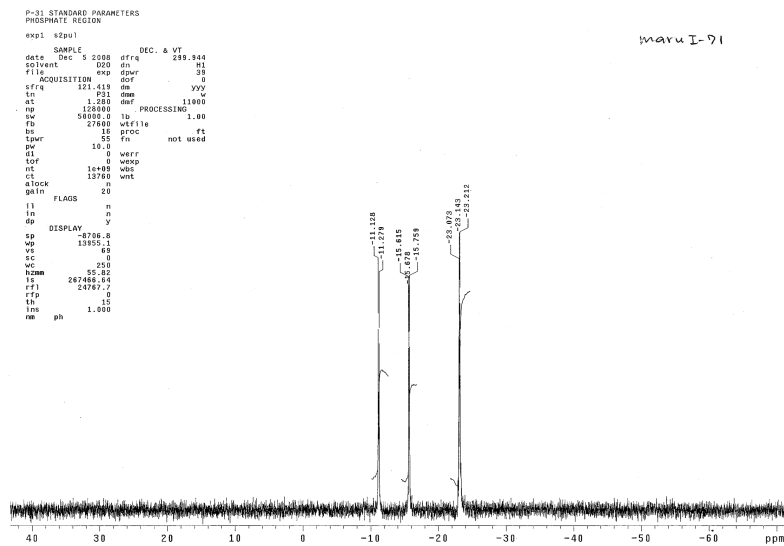

## Uridine-5'-(4-nitrophenyl)- tetraphosphate triethylammonium salt (24)

 $^1\text{H}$  NMR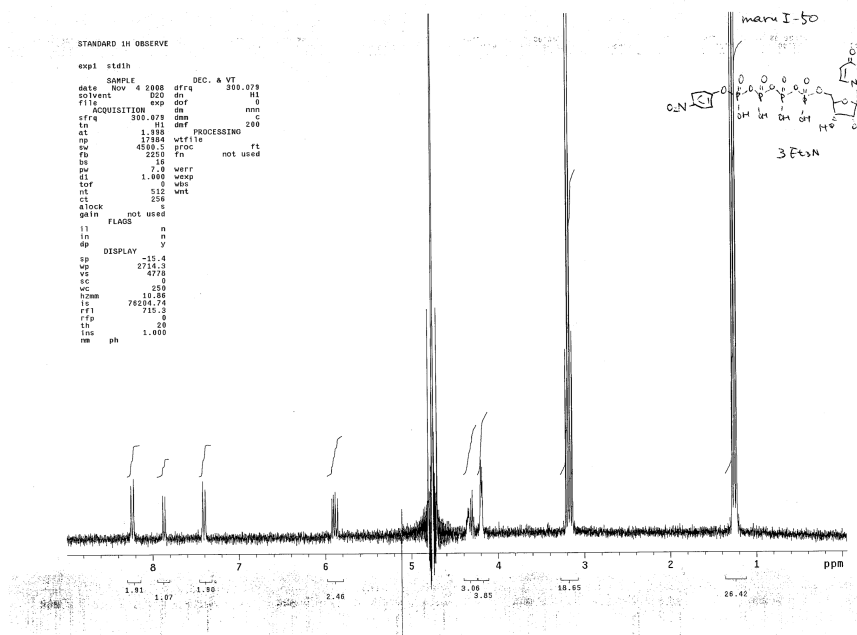 $^{31}\text{P}$  NMR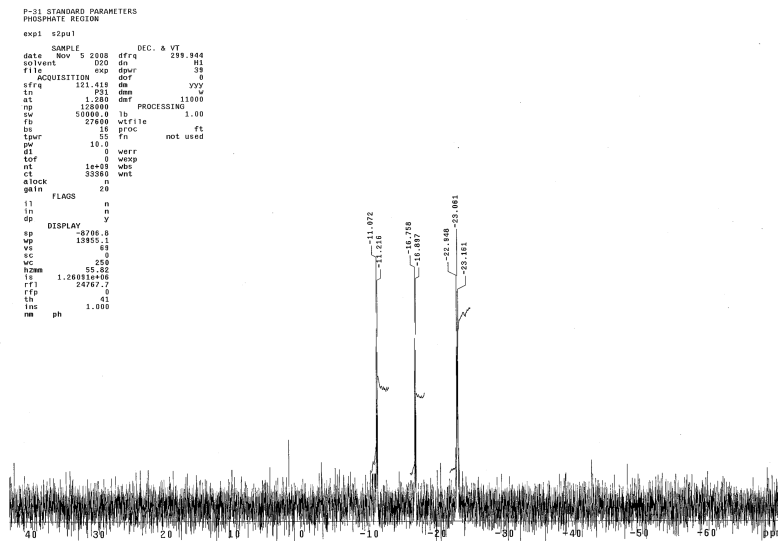

# Uridine-5'-(3-nitrophenyl)- tetraphosphate triethylammonium salt (25)

## $^1\text{H}$ NMR

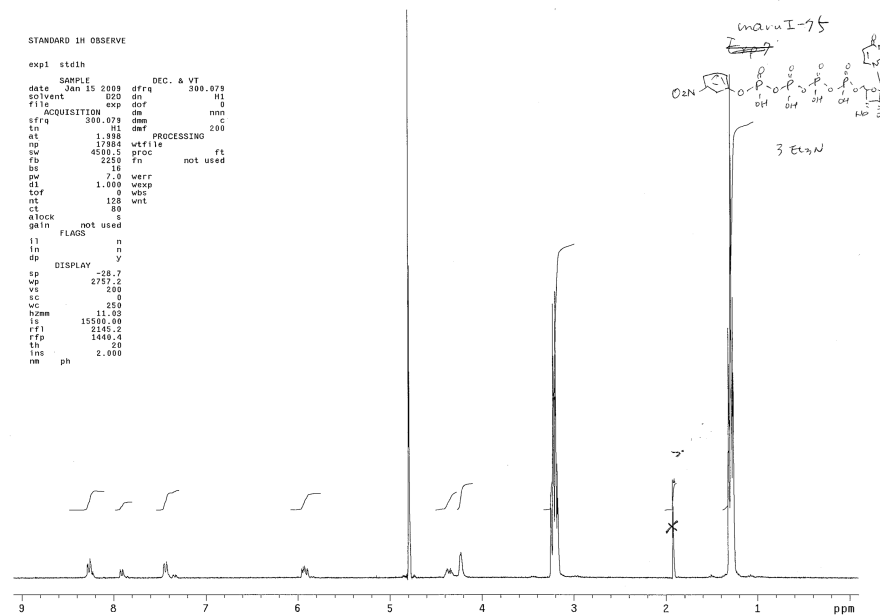

## $^{31}\text{P}$ NMR

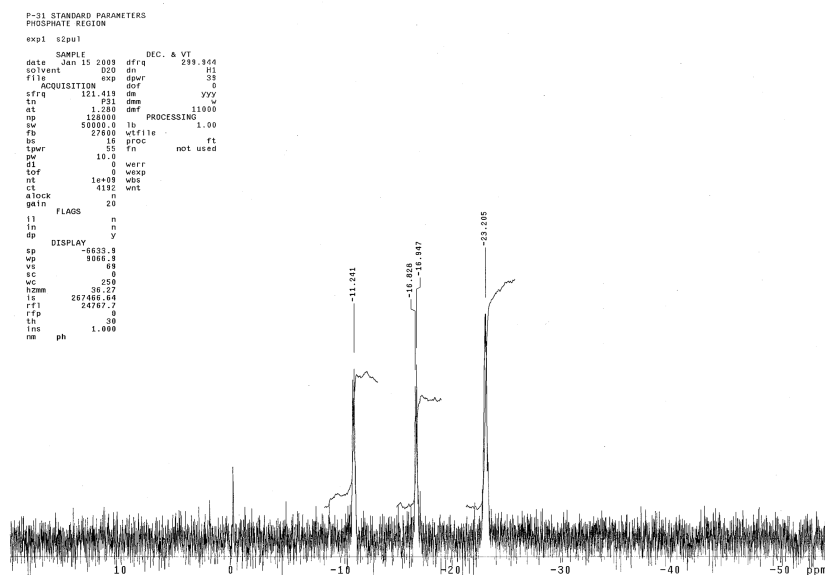

# Uridine-5'-glucose-1'- $\beta,\gamma$ -dichloromethylene tetraphosphate triethylammonium salt

(26)

 $^1\text{H}$  NMR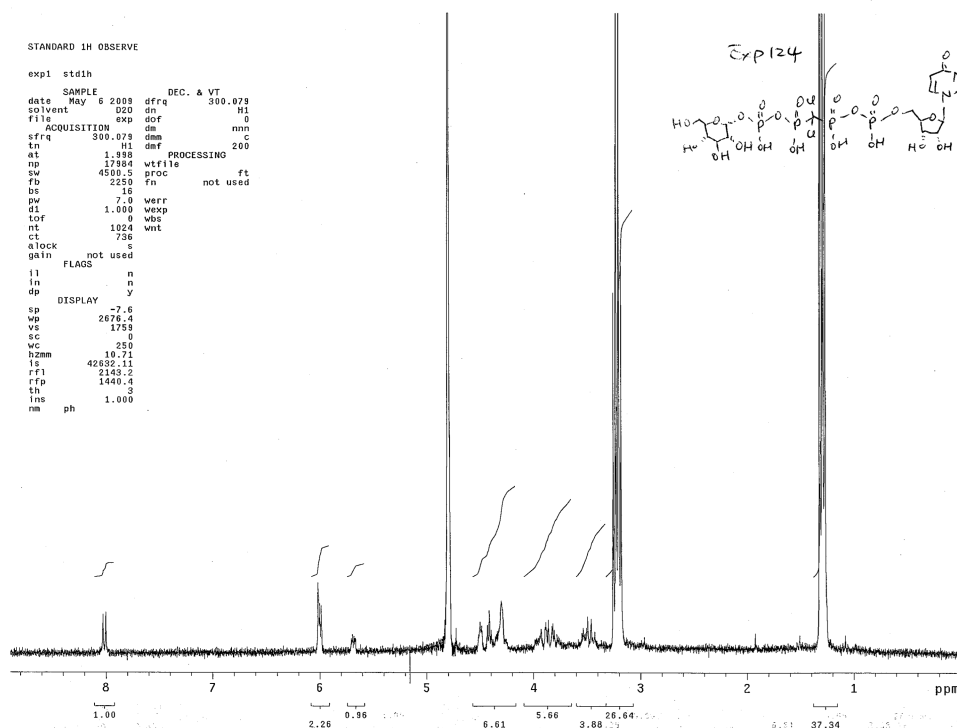

Mass

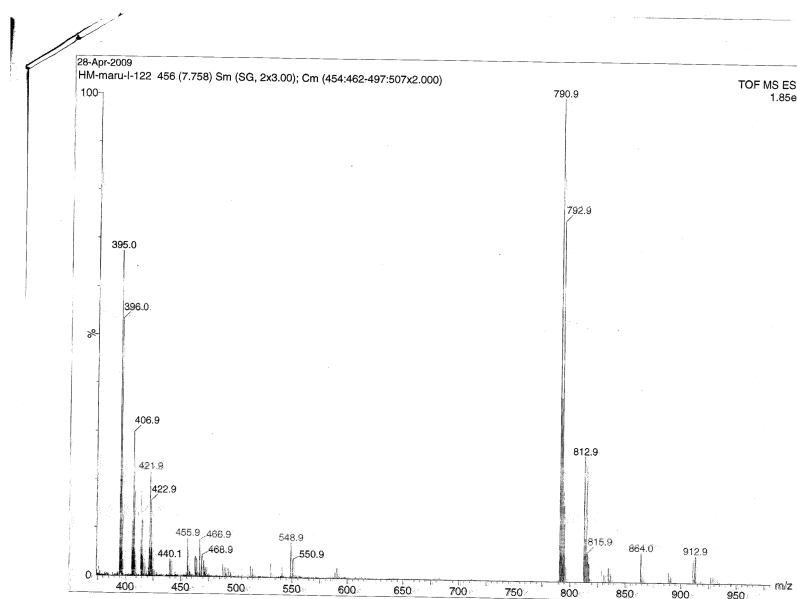

**Uridine-5'-allose-1'-tetrphosphate triethylammonium salt (28)****<sup>1</sup>H NMR**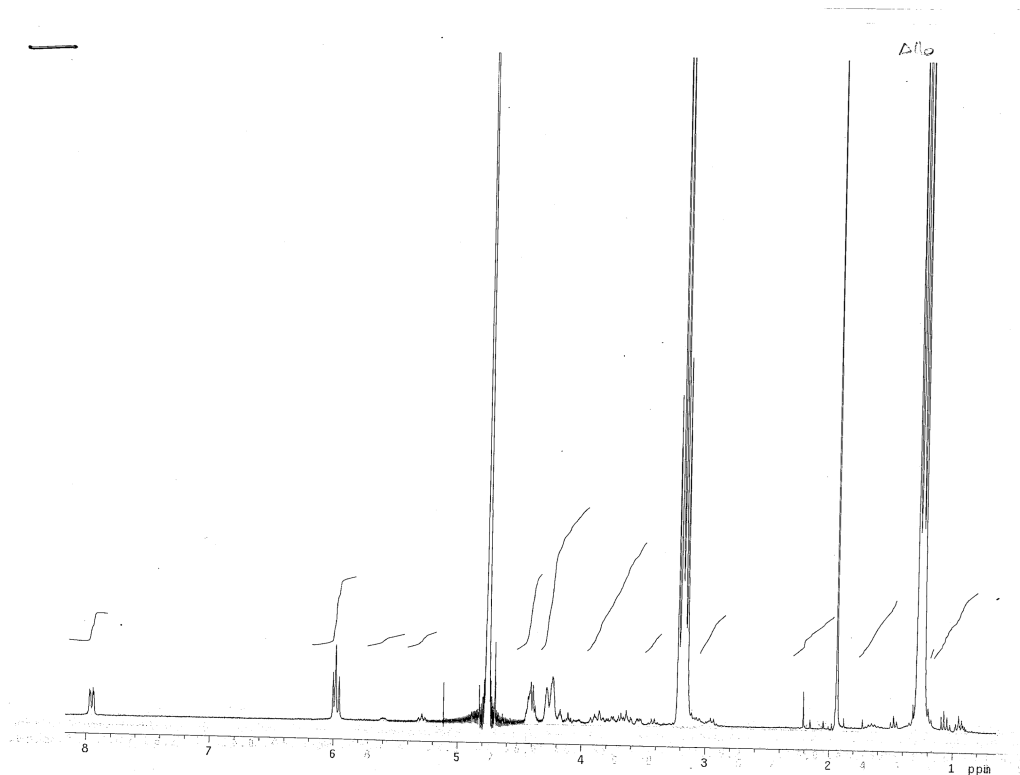**Mass**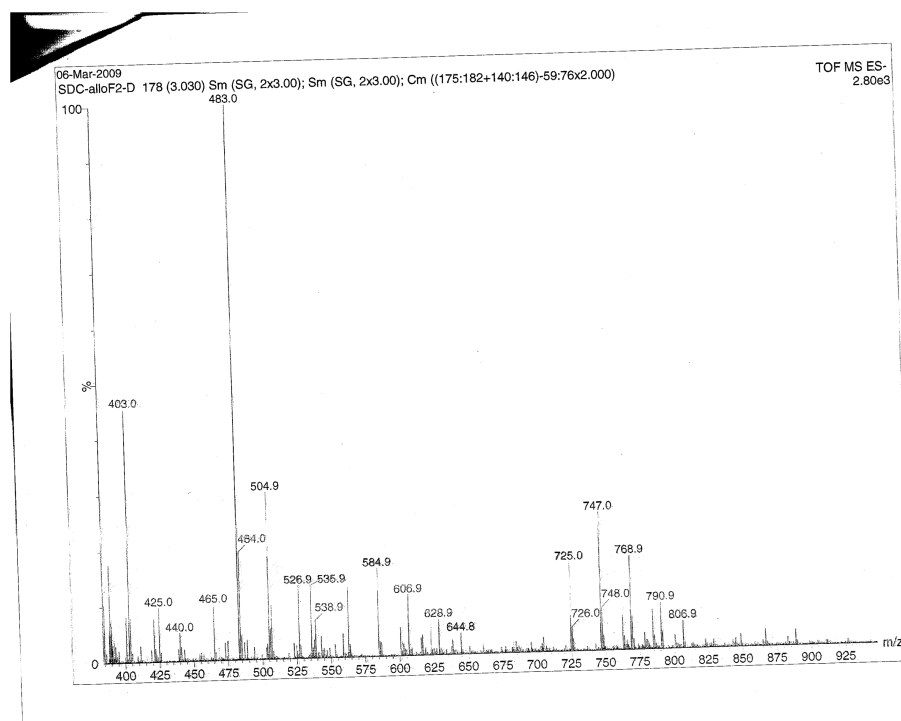



**Uridine-5'-mannose-1'-tetraphosphate triethylammonium salt (29)****<sup>1</sup>H NMR**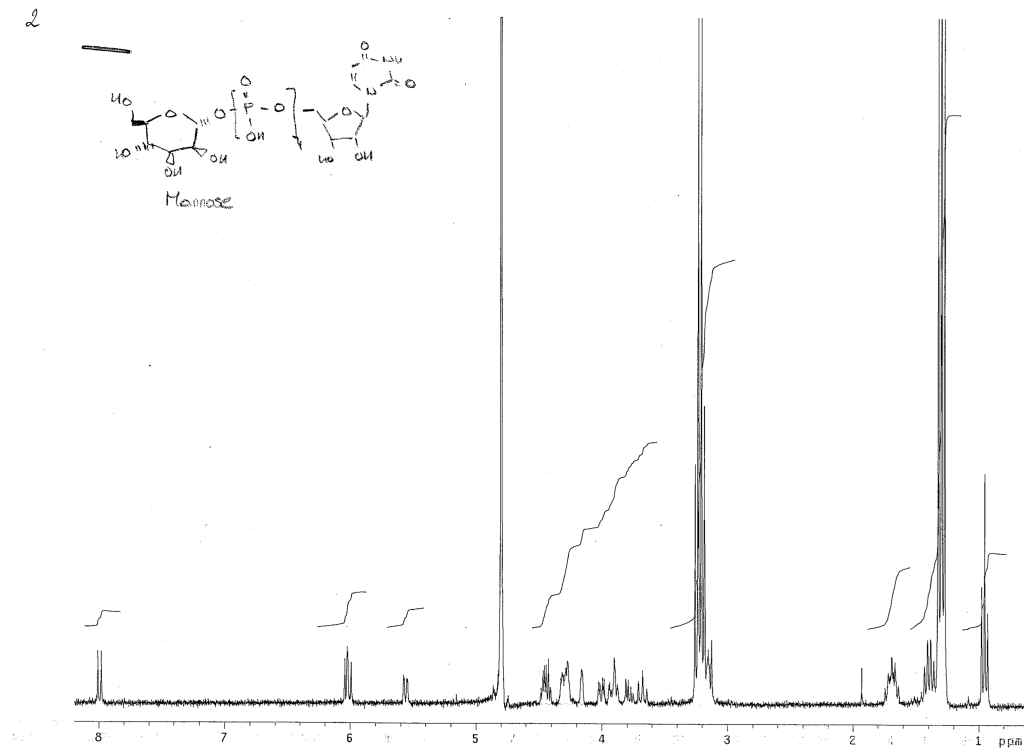**Mass**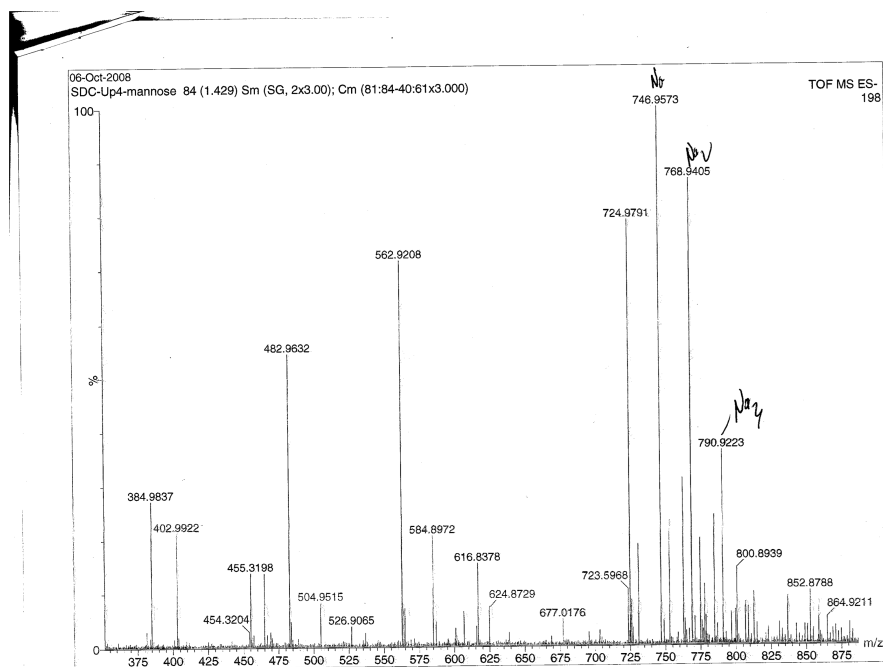

# Uridine-5'-xylose-1'-tetraphosphate triethylammonium salt (30)

## <sup>1</sup>H NMR

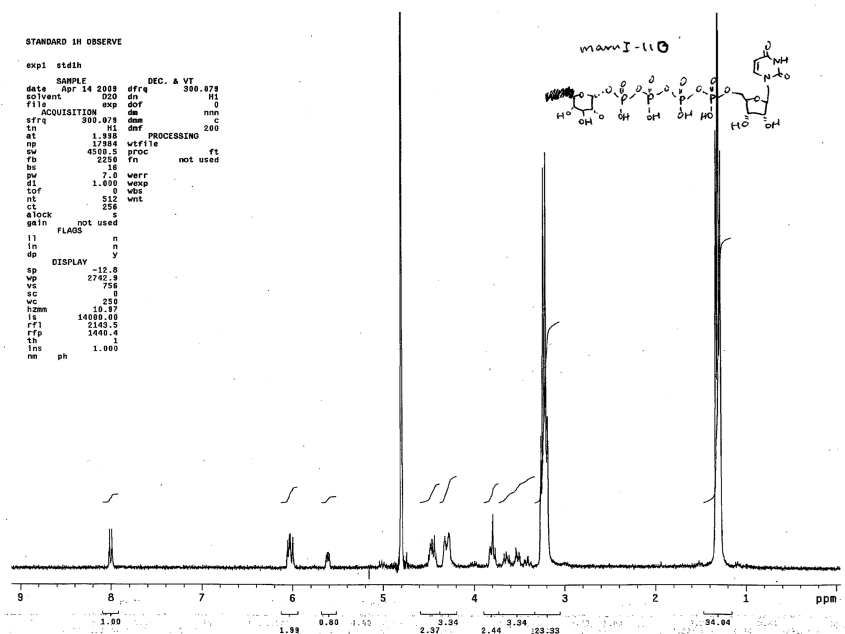

## Mass

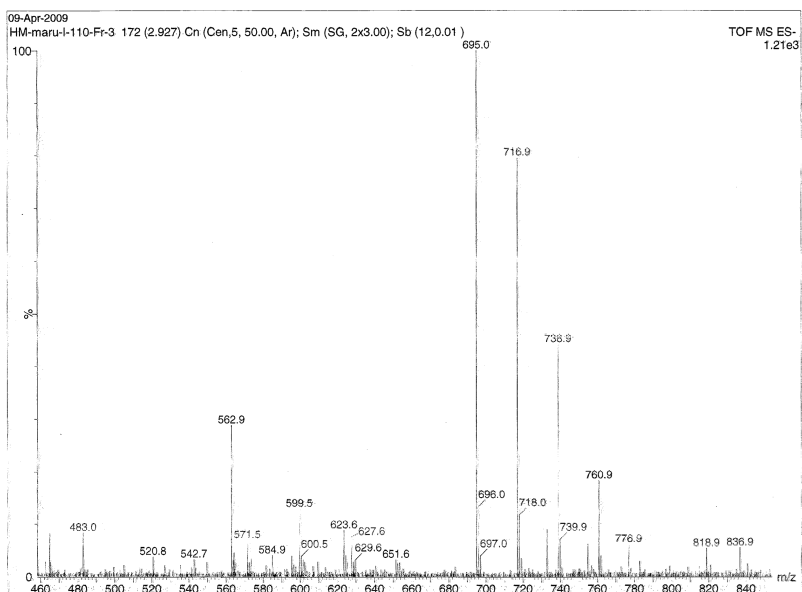

**P<sup>1</sup>-(Uridine-5'-)-P<sup>4</sup>-(2'-deoxy-2'-acetaminoglucose-1'-)tetraphosphate****triethylammonium salt (31)****<sup>1</sup>H NMR**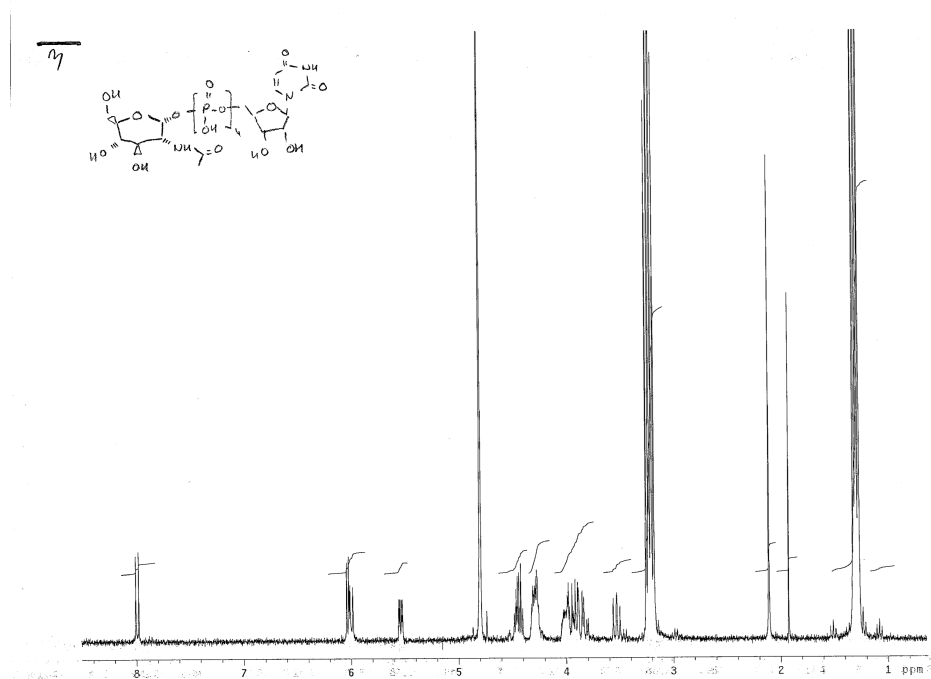**<sup>19</sup>F NMR** $\eta$

**P<sup>1</sup>-(Uridine-5'-)-P<sup>4</sup>-(glucuronic acid-1'-)tetraphosphate triethylammonium salt (32)****<sup>1</sup>H NMR**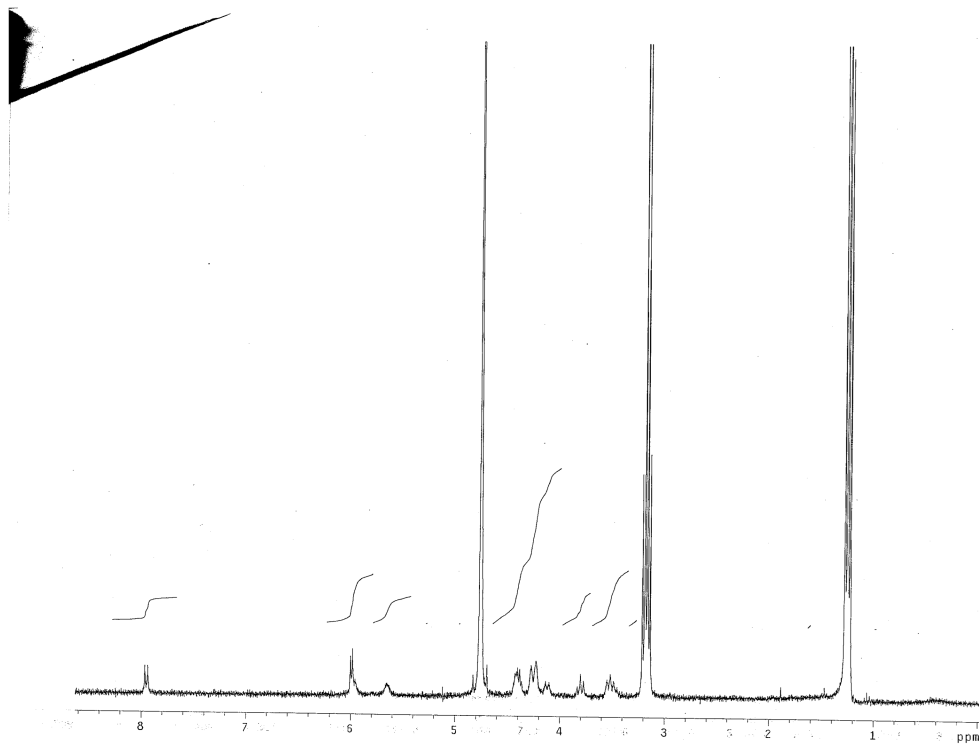**Mass**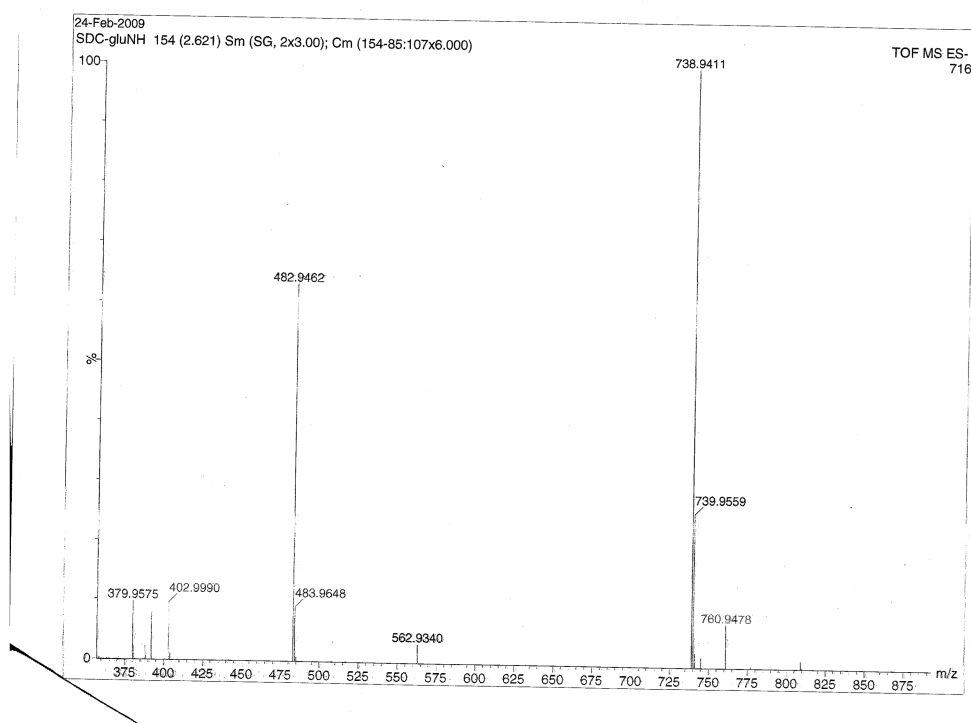

**P<sup>1</sup>-(Uridine-5'-)-P<sup>4</sup>-(2'-deoxy-2'-fluoroglucose-1'-)-tetrphosphate triethylammonium salt (33)**

**<sup>1</sup>H NMR**

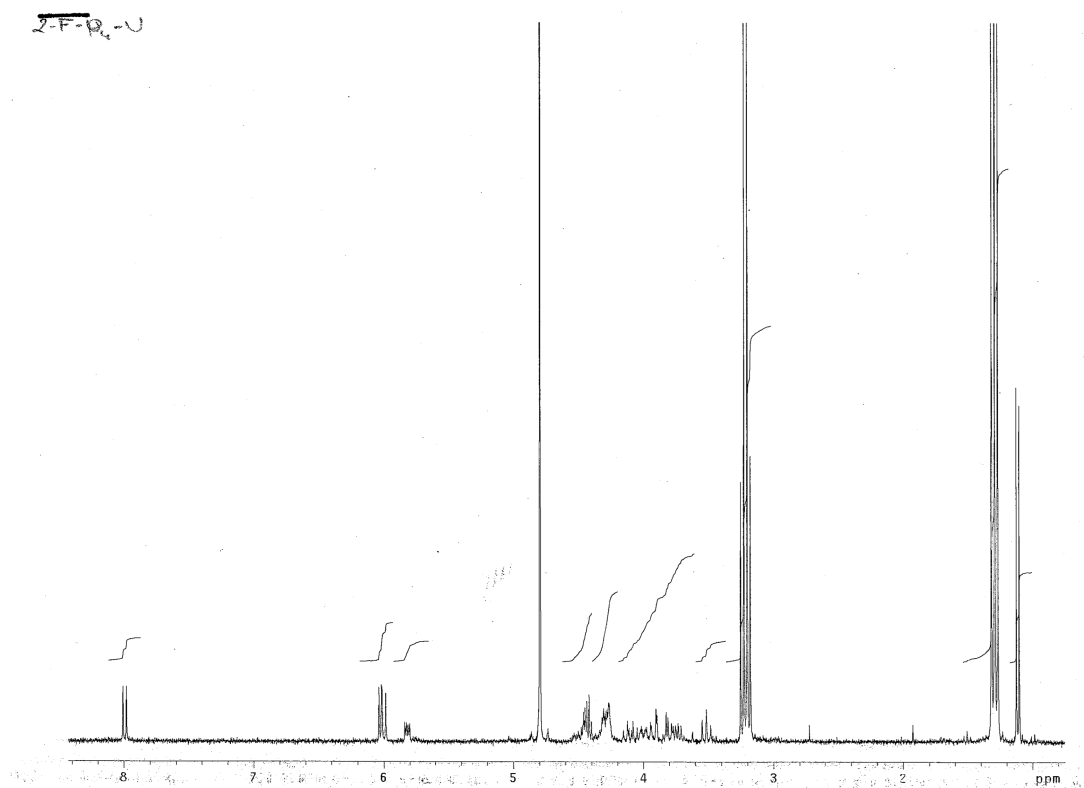

**Mass**

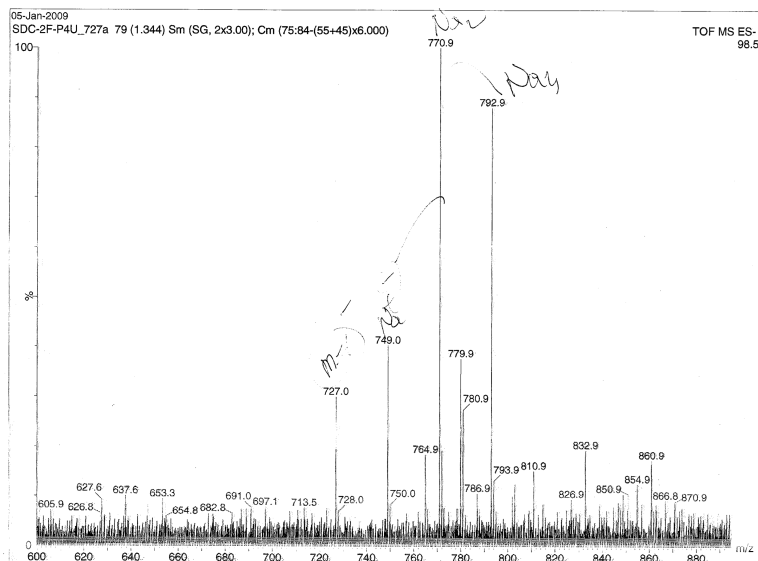

**P<sup>1</sup>-(Uridine-5'-)-P<sup>4</sup>-(3'-deoxy-3'-fluoroglucose-1'-)-tetrphosphate triethylammonium salt (34)**

**<sup>1</sup>H NMR**

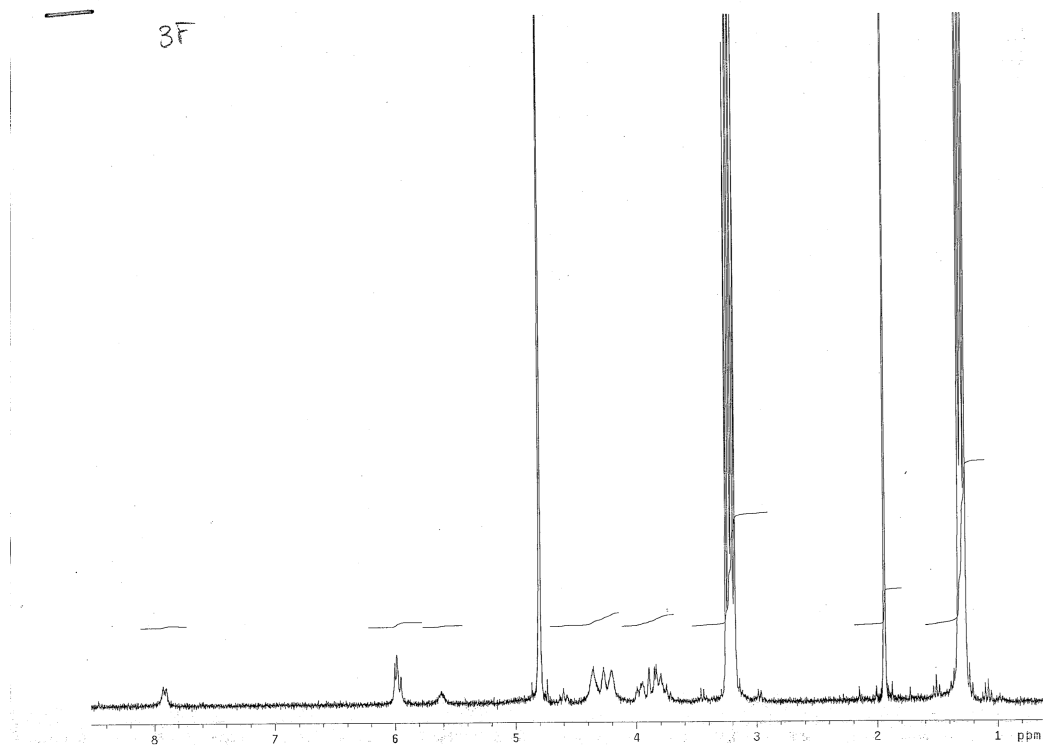

**Mass**

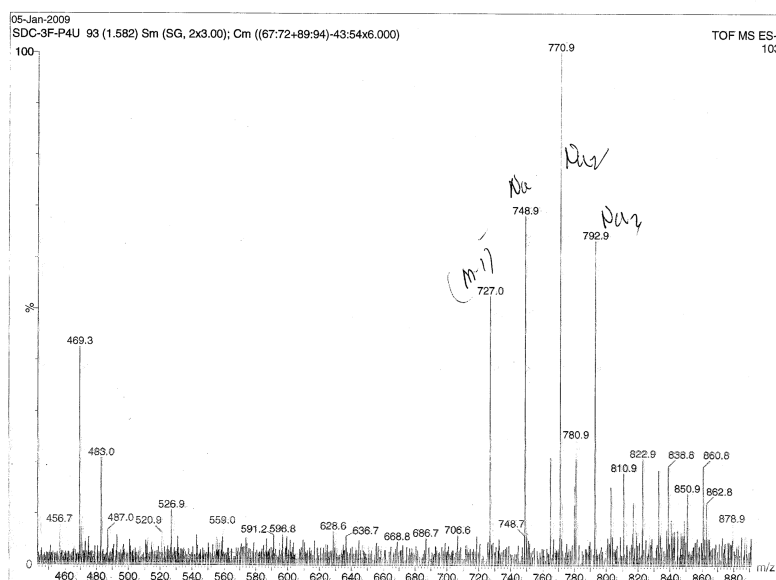

**P<sup>1</sup>-(N<sup>4</sup>-Benzyloxycytidine-5')P<sup>4</sup>-(3'-deoxy-3'-fluoroglucose-1')tetrphosphate  
triethylammonium salt (35)**

**<sup>1</sup>H NMR**

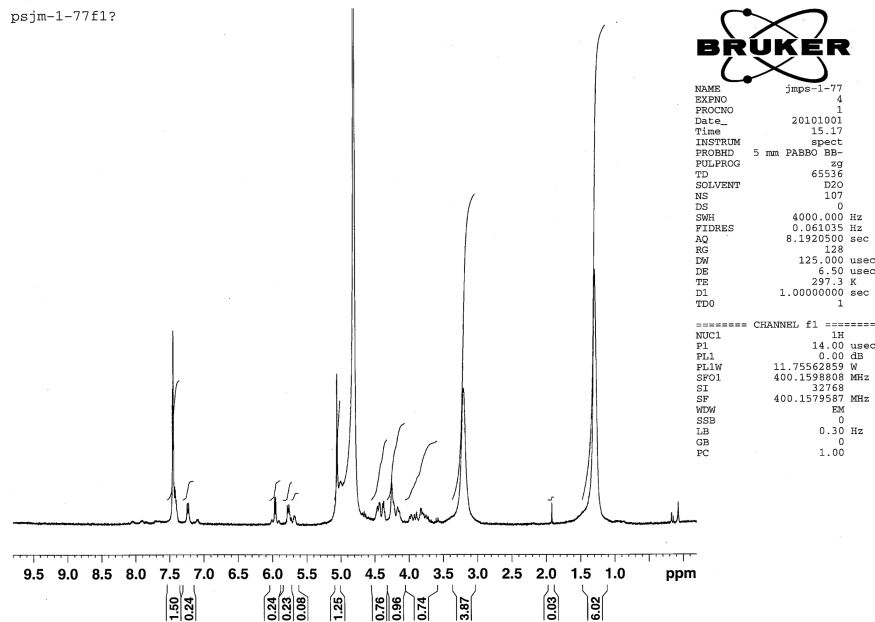

**<sup>31</sup>P NMR**

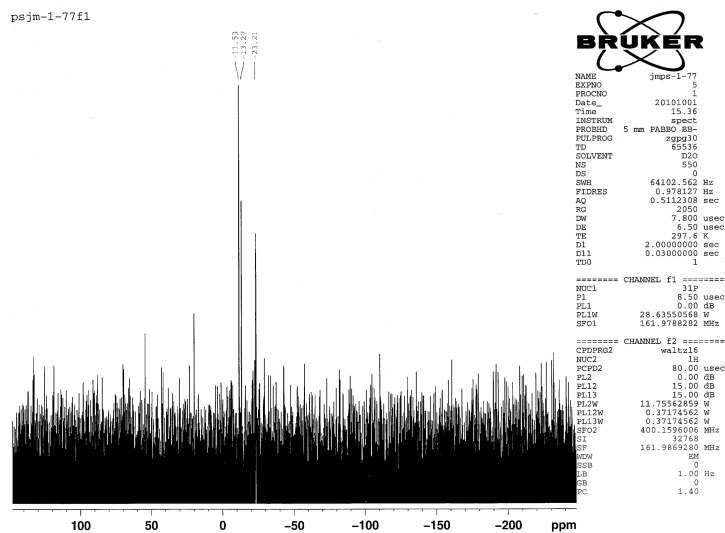

**P<sup>1</sup>-(N<sup>4</sup>-Methoxycytidine-5'-)-P<sup>4</sup>-(3'-deoxy-3'-fluoroglucose-1'-)-tetrphosphate  
triethylammonium salt (36)**

**<sup>1</sup>H NMR**

psjm-1-80

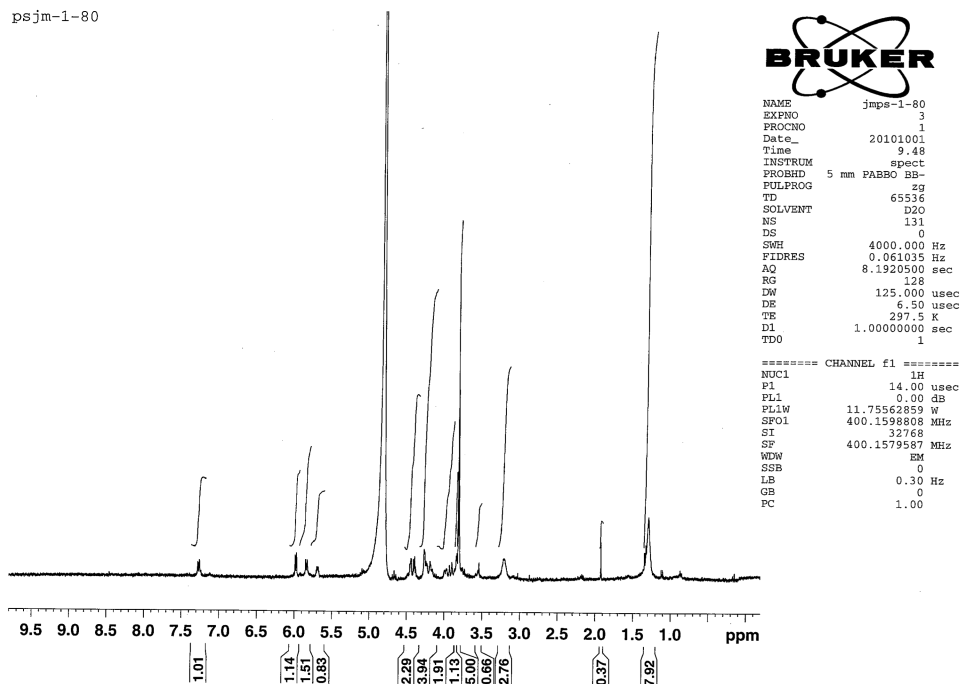

**Mass**

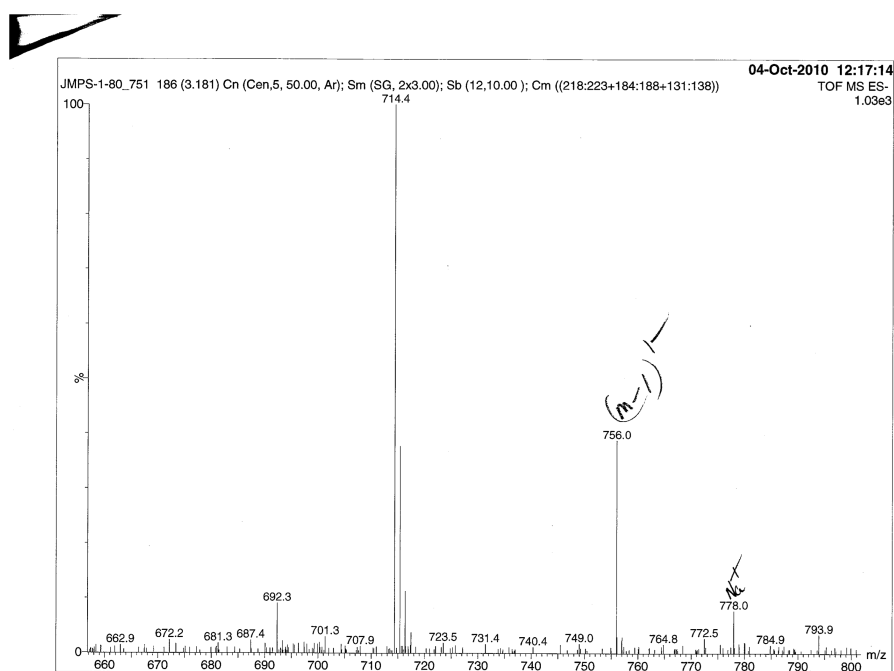



**P<sup>1</sup>-(Uridine-5'-)P<sup>4</sup>-(4'-deoxy-4'-fluoroglucose-1'-)tetraphosphate triethylammonium salt (37)**

**<sup>1</sup>H NMR**

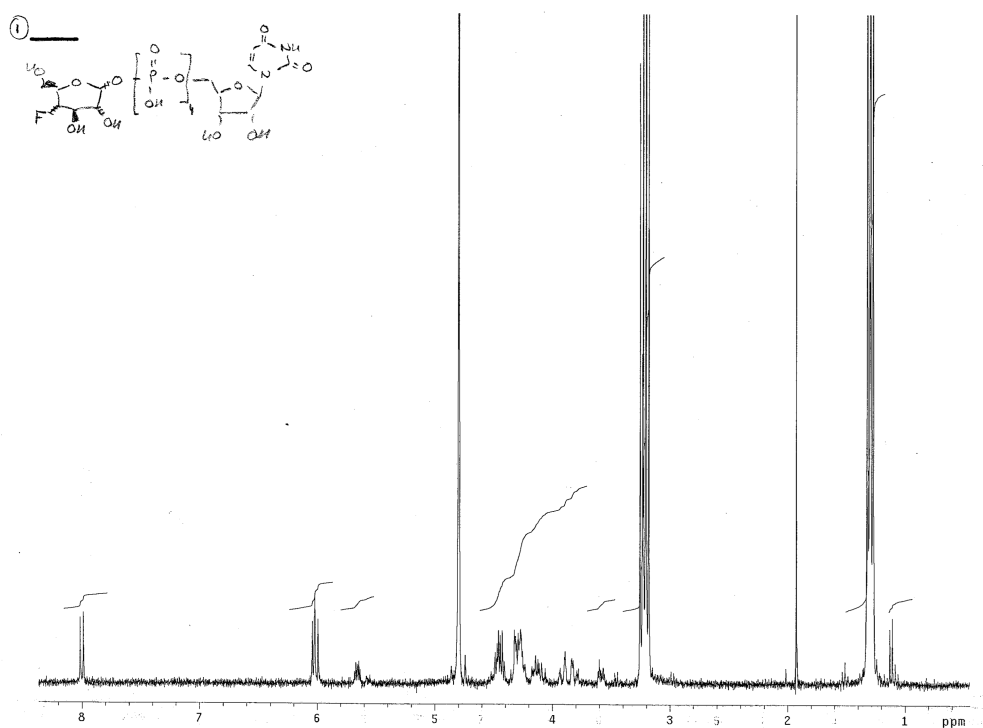

**<sup>19</sup>F NMR**

4F

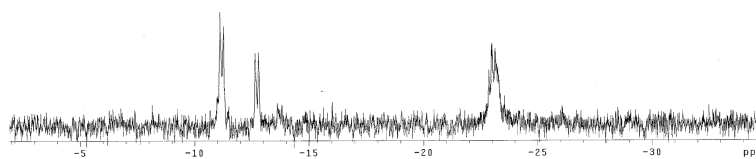

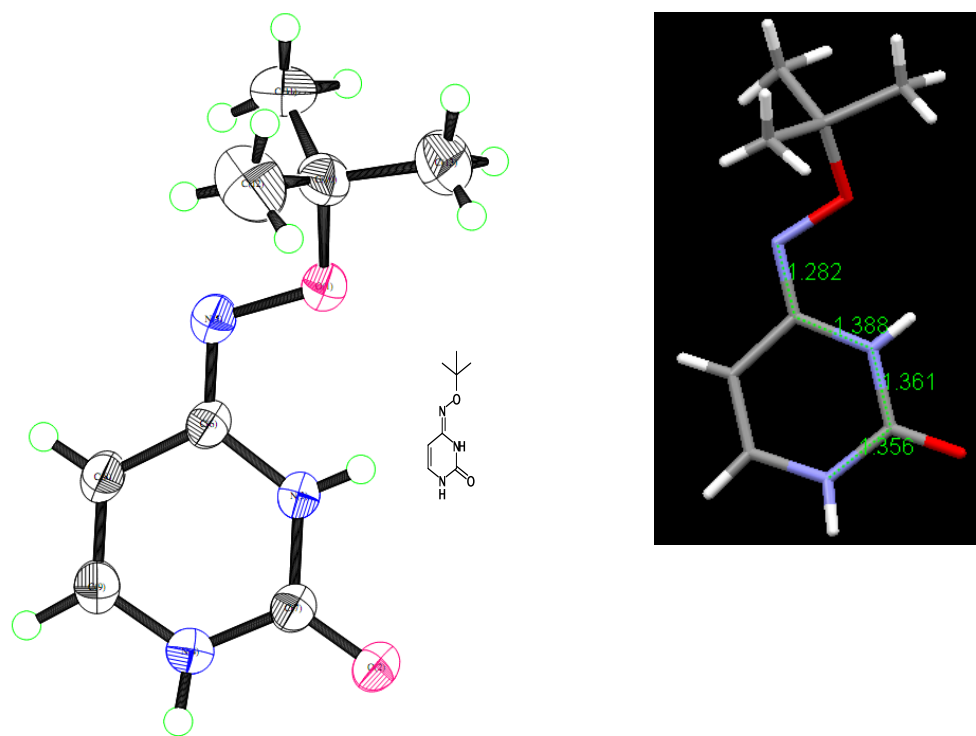

Figure 1. Structure of *N*<sup>4</sup>-*t*-BuO-cytosine determined by x-ray crystallography (bond lengths in Å).

|                                   |                                                                                                                    |
|-----------------------------------|--------------------------------------------------------------------------------------------------------------------|
| Identification code               | SMX10004                                                                                                           |
| Empirical formula                 | C <sub>8</sub> H <sub>13</sub> N <sub>3</sub> O <sub>2</sub>                                                       |
| Formula weight                    | 183.21                                                                                                             |
| Temperature                       | 296.2 K                                                                                                            |
| Wavelength                        | 0.7107 Å                                                                                                           |
| Crystal system                    | Monoclinic                                                                                                         |
| Space group                       | C 2/c                                                                                                              |
| Unit cell dimensions              | a = 21.98(1) Å    alpha = 90 deg.<br>b = 7.543(5) Å    beta = 105.16(2) deg.<br>c = 12.120(6) Å    gamma = 90 deg. |
| Volume                            | 1939(2) Å <sup>3</sup>                                                                                             |
| Z                                 | 8                                                                                                                  |
| Density (calculated)              | 1.255 Mg/m <sup>3</sup>                                                                                            |
| Absorption coefficient            | 0.092 mm <sup>-1</sup>                                                                                             |
| F(000)                            | 784                                                                                                                |
| Crystal size                      | 0.60 x 0.60 x 0.40 mm                                                                                              |
| Theta range for data collection   | 3.22 to 27.48 deg.                                                                                                 |
| Index ranges                      | -28 ≤ h ≤ 28, -9 ≤ k ≤ 9, -15 ≤ l ≤ 15                                                                             |
| Reflections collected             | 9631                                                                                                               |
| Independent reflections           | 2221 [R(int) = 0.01460]                                                                                            |
| Refinement method                 | Full-matrix least-squares on F <sup>2</sup>                                                                        |
| Data / restraints / parameters    | 2221 / 0 / 118                                                                                                     |
| Goodness-of-fit on F <sup>2</sup> | 1.081                                                                                                              |
| Final R indices [I > 2σ(I)]       | R1 = 0.0534, wR2 = 0.1651                                                                                          |
| R indices (all data)              | R1 = 0.0584, wR2 = 0.1707                                                                                          |
| Largest diff. peak and hole       | 0.378 and -0.259 e.Å <sup>-3</sup>                                                                                 |

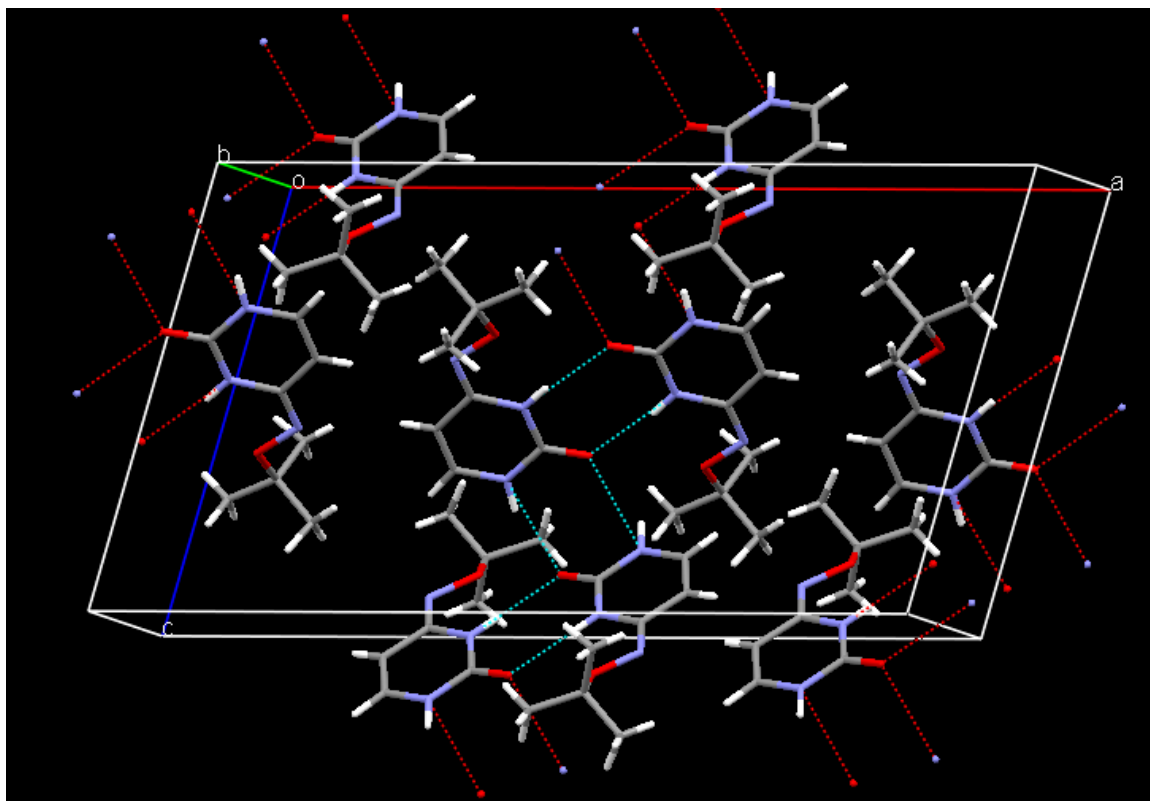

Figure 2. Crystal lattice of *N*<sup>4</sup>-*t*-BuO-cytosine determined by x-ray crystallography.

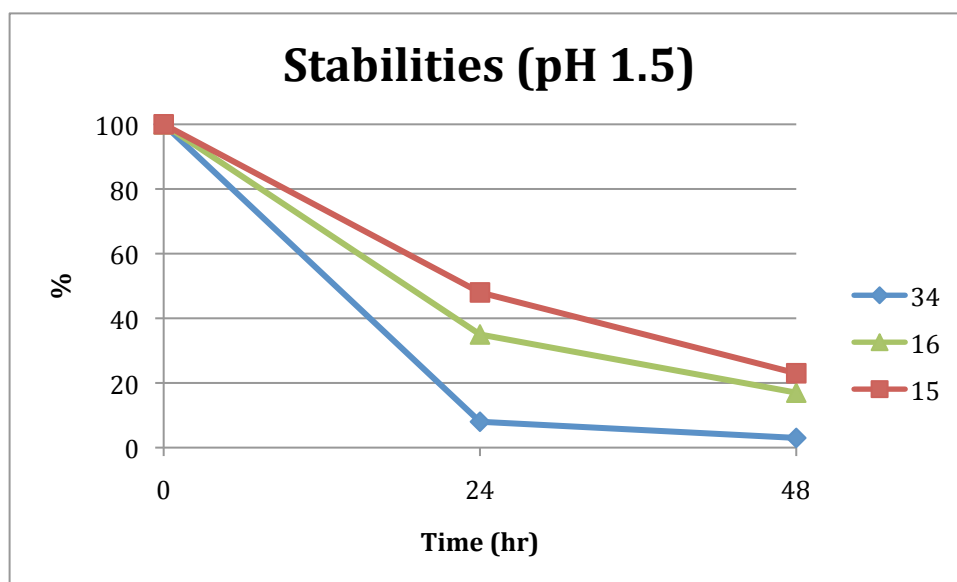

Figure 3. Stability data at pH 1.5 (37°C) for compounds **15**, **16**, and **34**.

Figure 4. NOESY experiment for compound 39

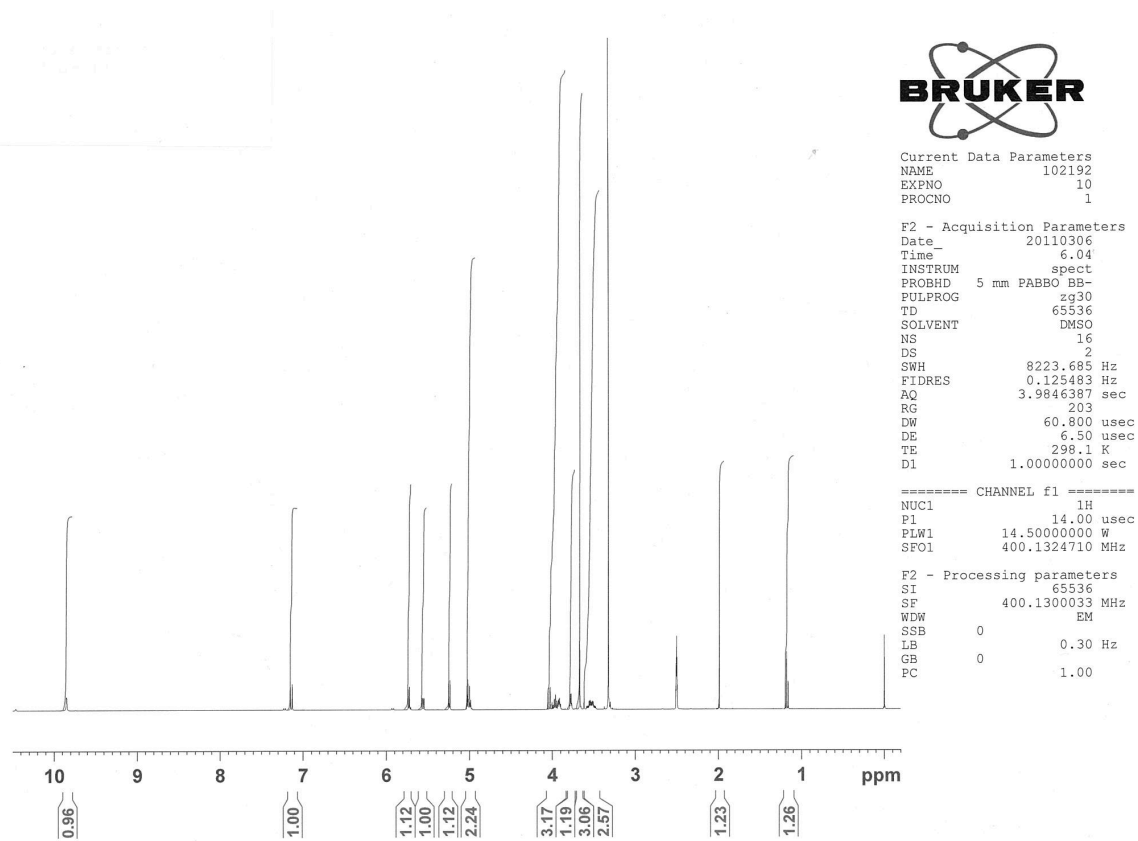

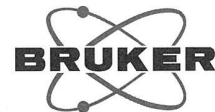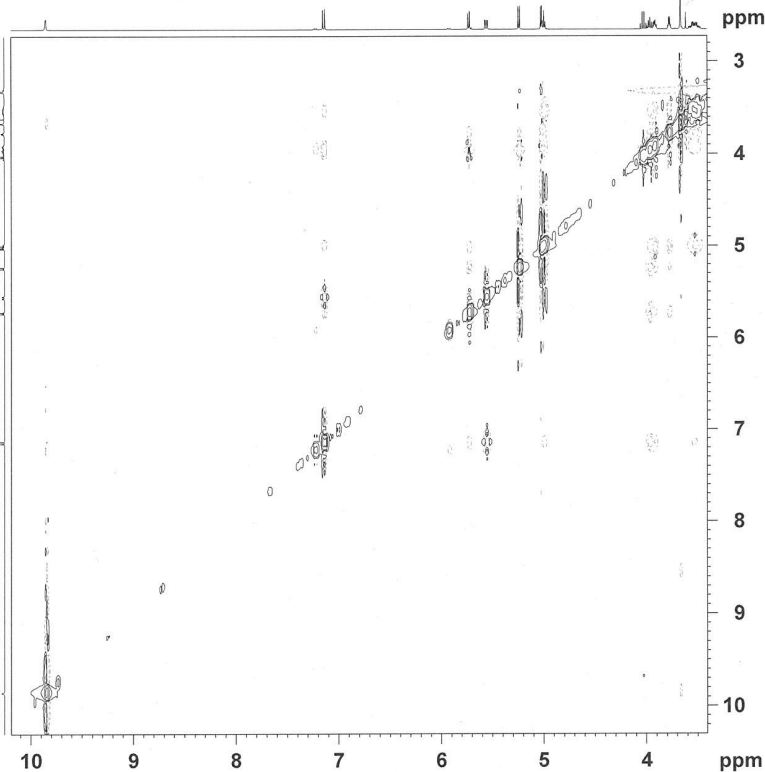

Current Data Parameters  
 NAME 102192  
 EXPNO 11  
 PROCNO 1

F2 - Acquisition Parameters  
 Date 20110306  
 Time 6.39  
 INSTRUM spect  
 PROBHD 5 mm PABBO BB-  
 PULPROG noesyppbpbp  
 TD 2048  
 SOLVENT DMSO  
 NS 128  
 DS 32  
 SWH 4545.455 Hz  
 FIDRES 2.219460 Hz  
 AQ 0.2253300 sec  
 RG 114  
 DW 110.000 usec  
 DE 6.50 usec  
 TE 298.1 K  
 D0 0.0009217 sec  
 D1 2.02339492 sec  
 D8 0.30000001 sec  
 D11 0.03000000 sec  
 D12 0.00020000 sec  
 D16 0.00020000 sec  
 INO 0.00022000 sec

----- CHANNEL f1 -----  
 NUC1 1H  
 P1 14.00 usec  
 P2 28.00 usec  
 P17 2500.00 usec  
 PLW1 14.50000000 W  
 PLW0 3.15779996 W  
 SFO1 400.131993 MHz

----- GRADIENT CHANNEL -----  
 GPM1 SMSQ10.100  
 GPZ1 40.00 %  
 P16 1000.00 usec

F1 - Acquisition parameters  
 TD 256  
 SFO1 400.132 MHz  
 FIDRES 17.755682 Hz  
 SW 11.360 ppm  
 FMODE States-TPPI

F2 - Processing parameters  
 SI 1024  
 SF 400.1300033 MHz  
 WW QFINE  
 SSB 2  
 LB 0 Hz  
 GB 0  
 PC 1.00

F1 - Processing parameters  
 SI 1024  
 MC2 States-TPPI  
 SF 400.1300033 MHz  
 WW QFINE  
 SSB 2  
 LB 0 Hz  
 GB 0

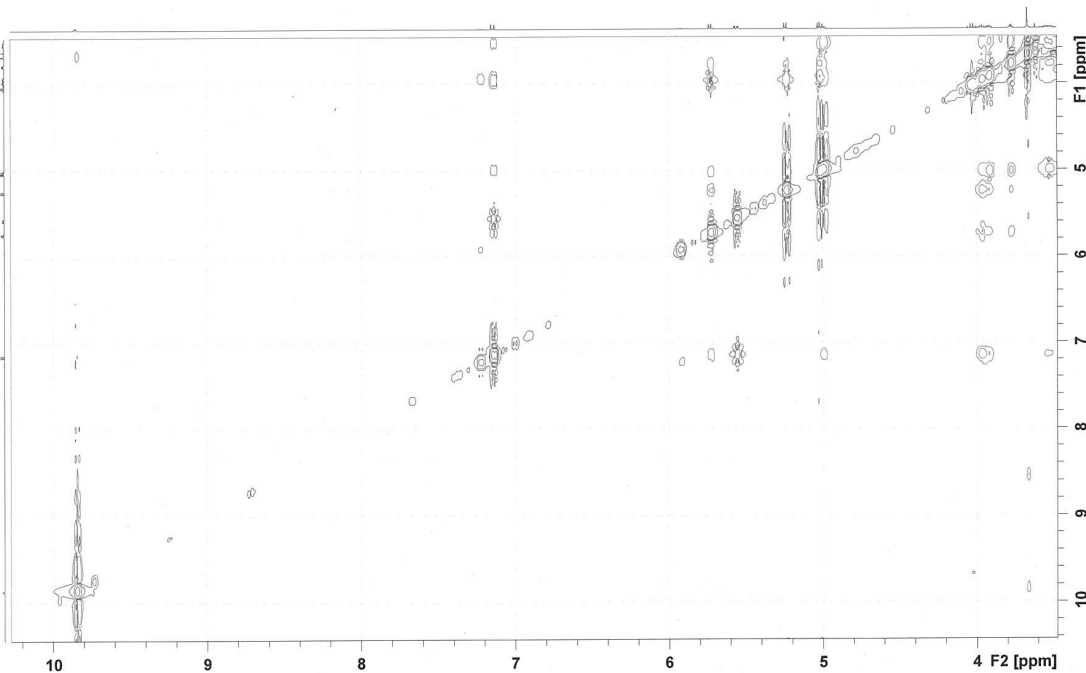

Supplement: NIHMS293527-supplement-1_si_001.pdf [file NIHMS293527-supplement-1_si_001.pdf]
